# Supplementary material
Source: MDPI journal article supplement (https://www.mdpi.com/2673-4583/5/1/20)

# Bioactive compounds profiling and nutritional composition of three species from the Amaranthaceae family

B. Nuñez-Estevez<sup>1,2</sup>, T. C. Finimundy<sup>2</sup>, M. Carpena<sup>1</sup>, M. Barral-Martinez<sup>1</sup>, R. Calhelha<sup>2</sup>, T. C. S. P. Pires<sup>2</sup>, Paz Otero<sup>1</sup>, P. Garcia-Perez<sup>1</sup>, J. Simal-Gandara<sup>1</sup>, I.C.F.R. Ferreira<sup>2</sup>, M.A. Prieto<sup>1,2,\*</sup>, and L. Barros<sup>2,\*</sup>

**1 Nutrition and Bromatology Group, Faculty of Food Science and Technology, University of Vigo, Ourense Campus, E32004 Ourense, Spain**

**2 Centro de Investigação de Montanha (CIMO), Instituto Politécnico de Bragança, Campus de Santa Apolónia, 5300-253 Bragança, Portugal**

Correspondence: [\\*mprieto@uvigo.es](mailto:*mprieto@uvigo.es); [\\*lillian@ipb.pt](mailto:*lillian@ipb.pt)

# Introduction

A  
M  
A  
R  
A  
N  
T  
H  
A  
C  
E  
A  
E  
  
F  
A  
M  
I  
L  
Y

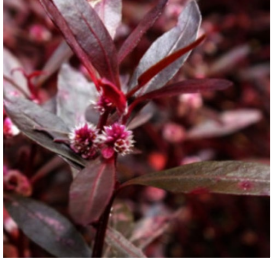

*Alternanthera sessilis*

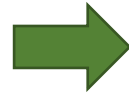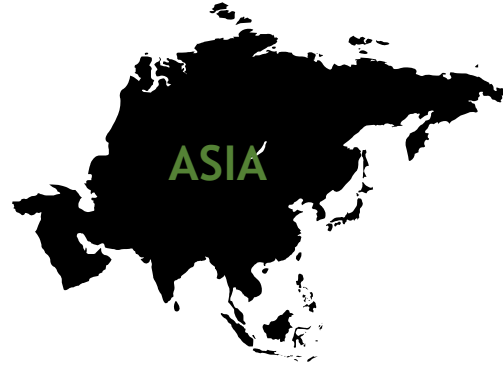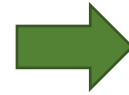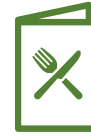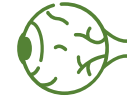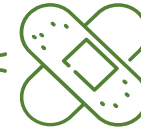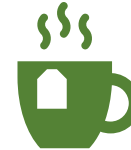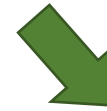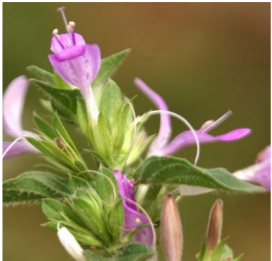

*Dicliptera chinensis*

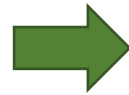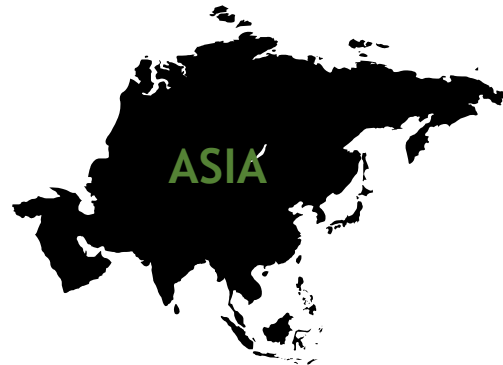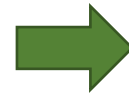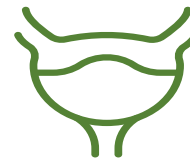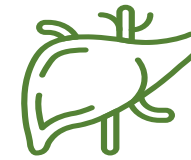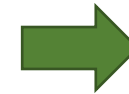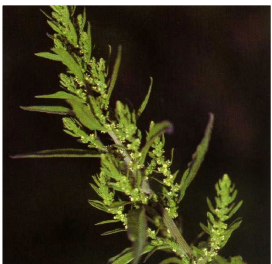

*Dysphania ambrosioides*

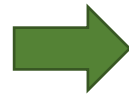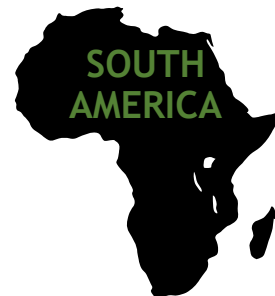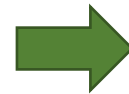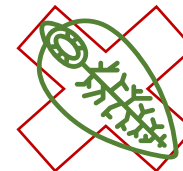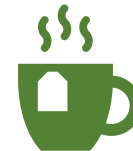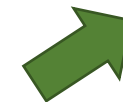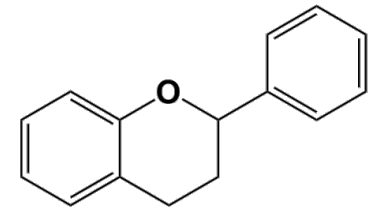

*Bioactive compounds*

# Material and Methods

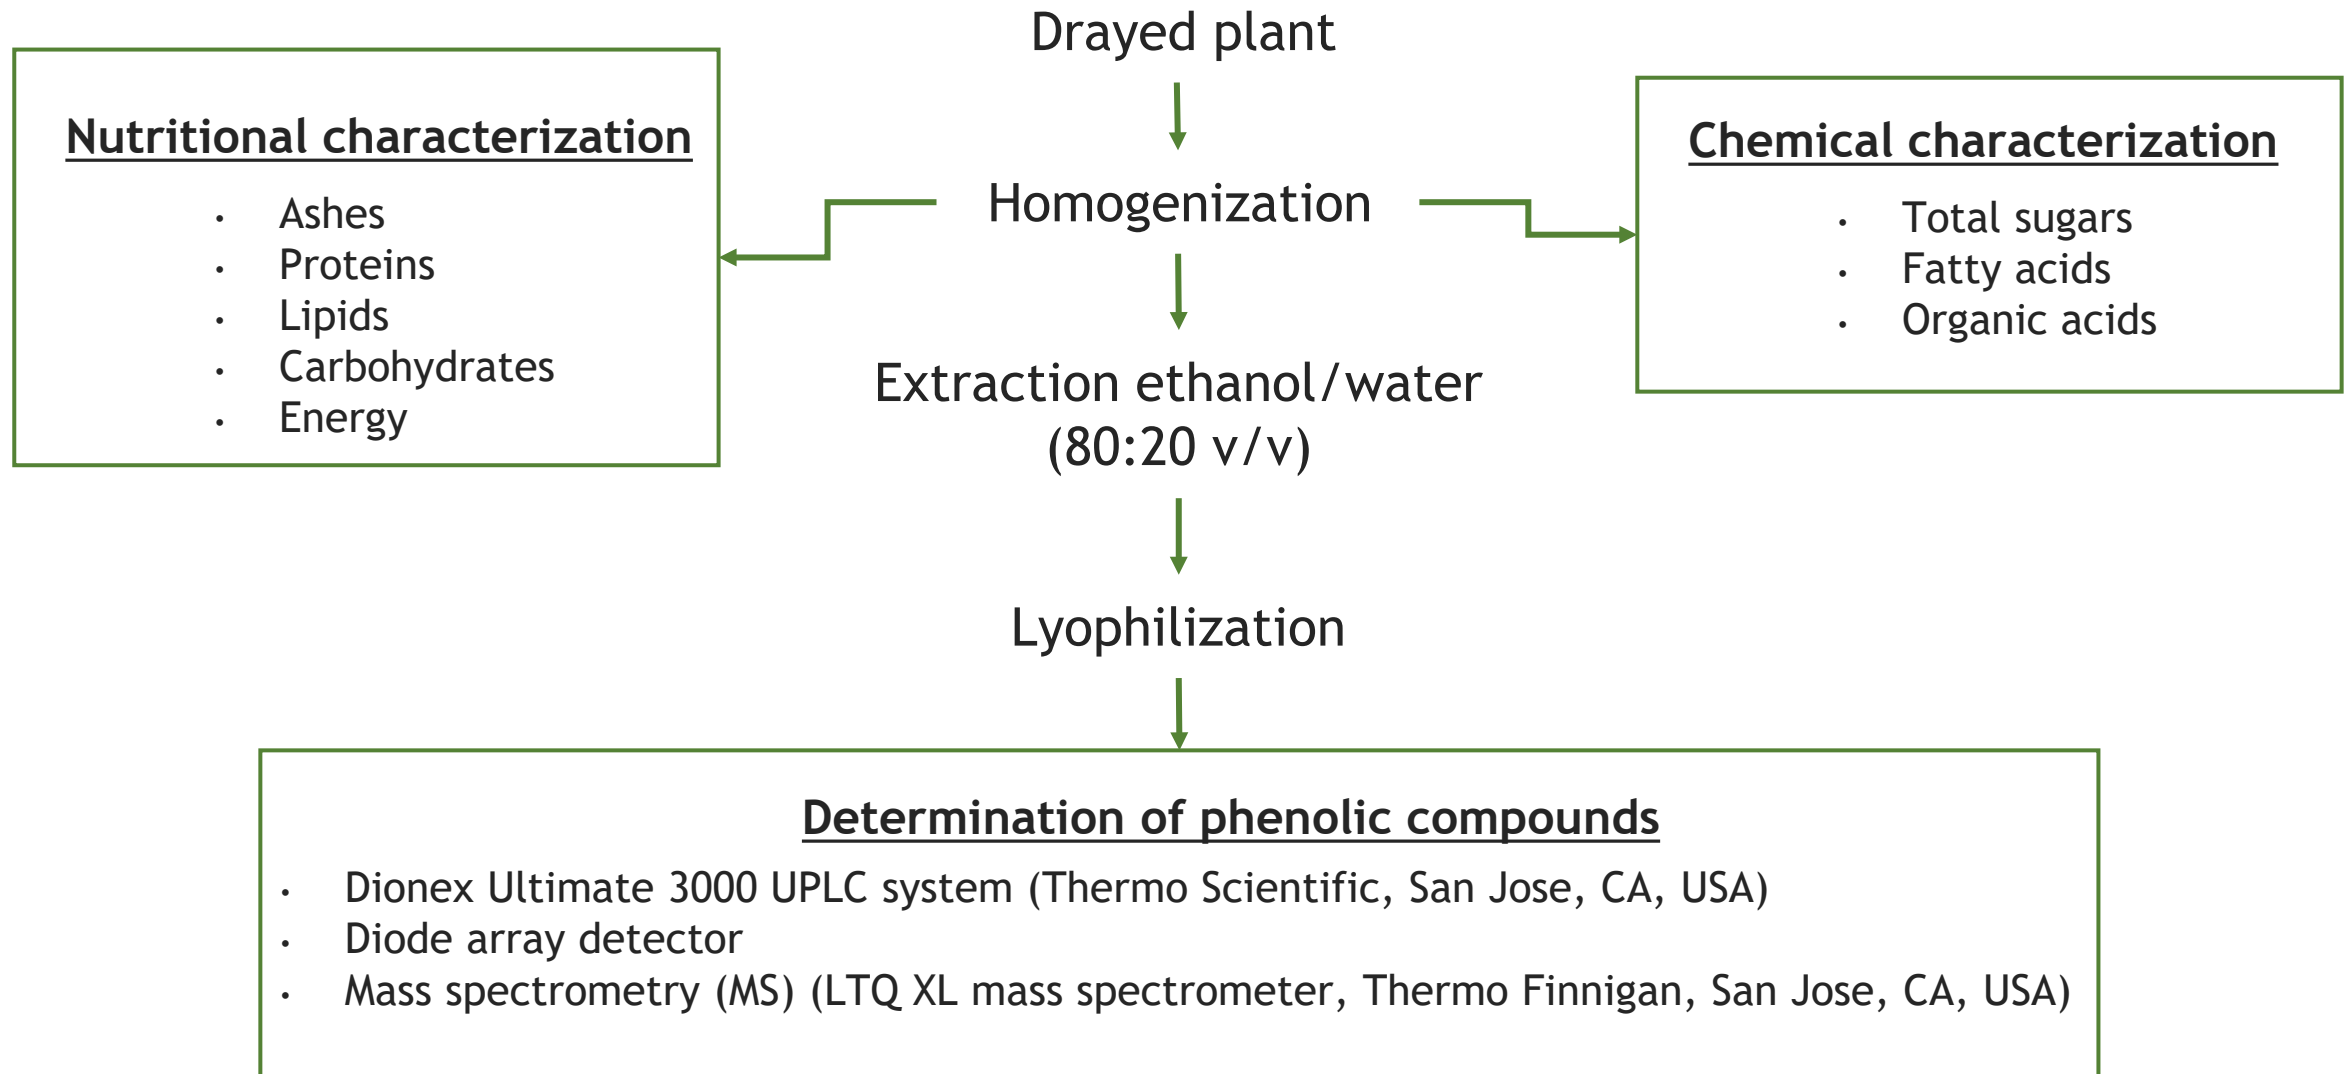

# Results

## Nutritional characterization

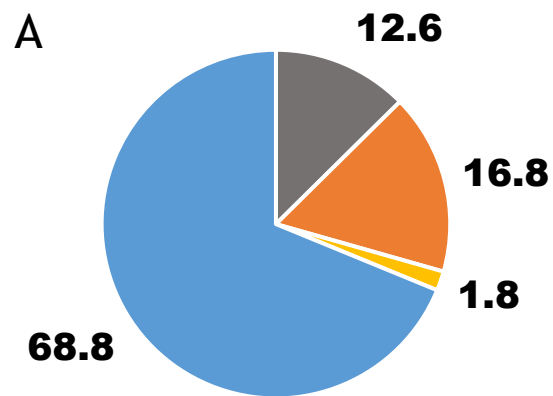

**Energy**  
363.7 ± 0.3 kcal/100 g dw

*A. sessilis*

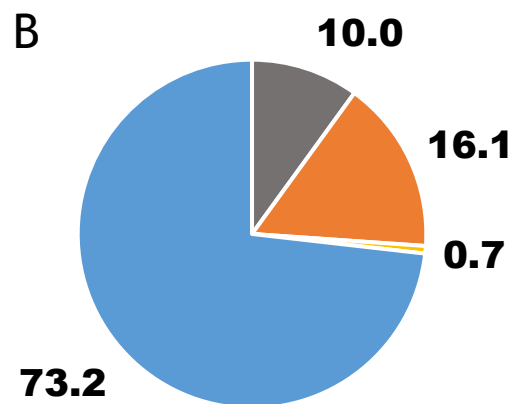

**Energy**  
358.8 ± 5.3 kcal/100 g dw

*D. chinensis*

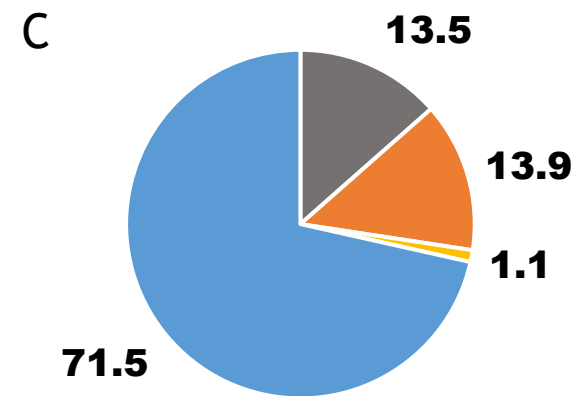

**Energy**  
351.5 ± 2.1 kcal/100 g dw

*D. ambrosioides*

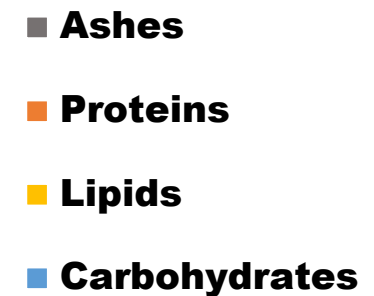

|              |                                                                     |  |                                                            |
|--------------|---------------------------------------------------------------------|--|------------------------------------------------------------|
| <b>Ashes</b> | <i>D. ambrosioides</i><br><i>D. chinensis</i><br><i>A. sessilis</i> |  | Other genders of<br>Amaranthaceae<br>( <i>Amaranthum</i> ) |
|--------------|---------------------------------------------------------------------|--|------------------------------------------------------------|

|                 |                                           |  |                                              |
|-----------------|-------------------------------------------|--|----------------------------------------------|
| <b>Proteins</b> | <i>A. sessilis</i><br><i>D. chinensis</i> |  | <i>Chenopodium</i><br><i>quinoa</i> (quinoa) |
|-----------------|-------------------------------------------|--|----------------------------------------------|

|               |                                               |  |  |
|---------------|-----------------------------------------------|--|--|
| <b>Lipids</b> | <i>D. ambrosioides</i><br><i>D. chinensis</i> |  |  |
|---------------|-----------------------------------------------|--|--|

|                      |                                                                     |  |  |
|----------------------|---------------------------------------------------------------------|--|--|
| <b>Carbohydrates</b> | <i>D. ambrosioides</i><br><i>D. chinensis</i><br><i>A. sessilis</i> |  |  |
|----------------------|---------------------------------------------------------------------|--|--|

# Results

## Chemical characterization

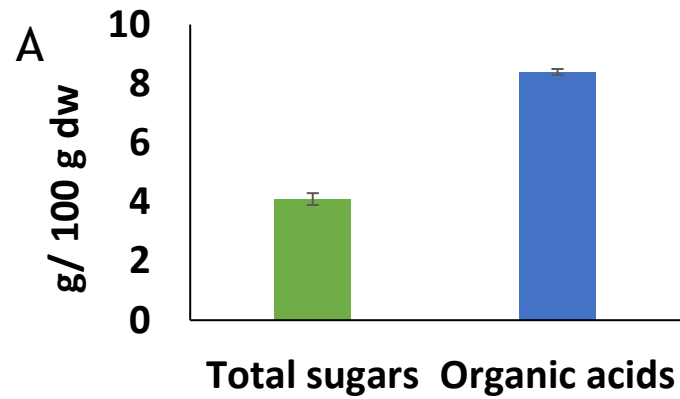

*A. sessilis*

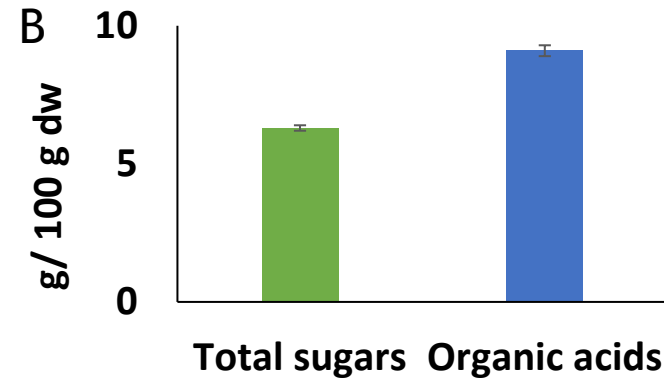

*D. chinensis*

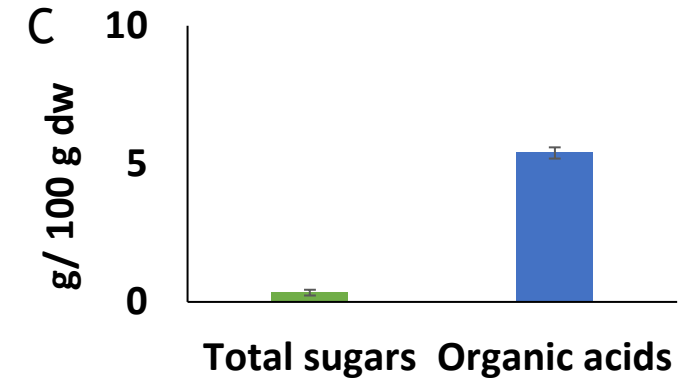

*D. ambrosioides*

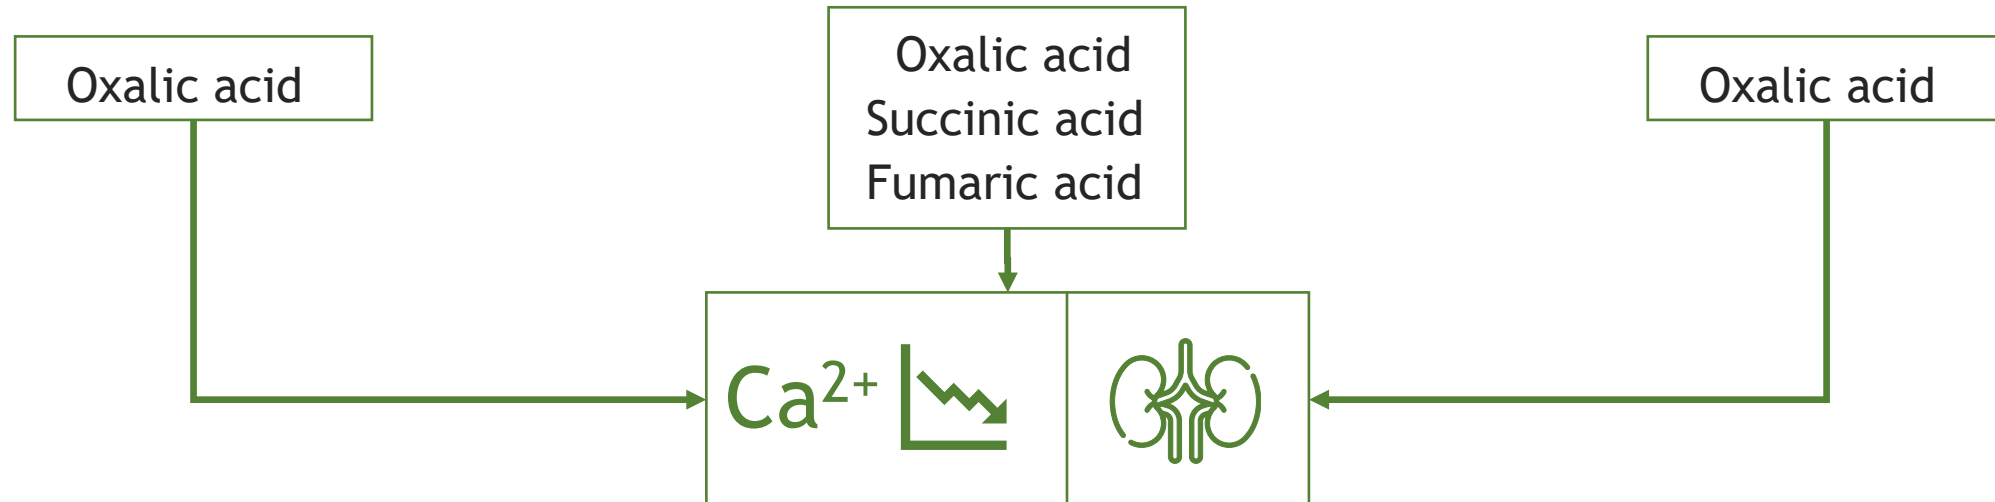

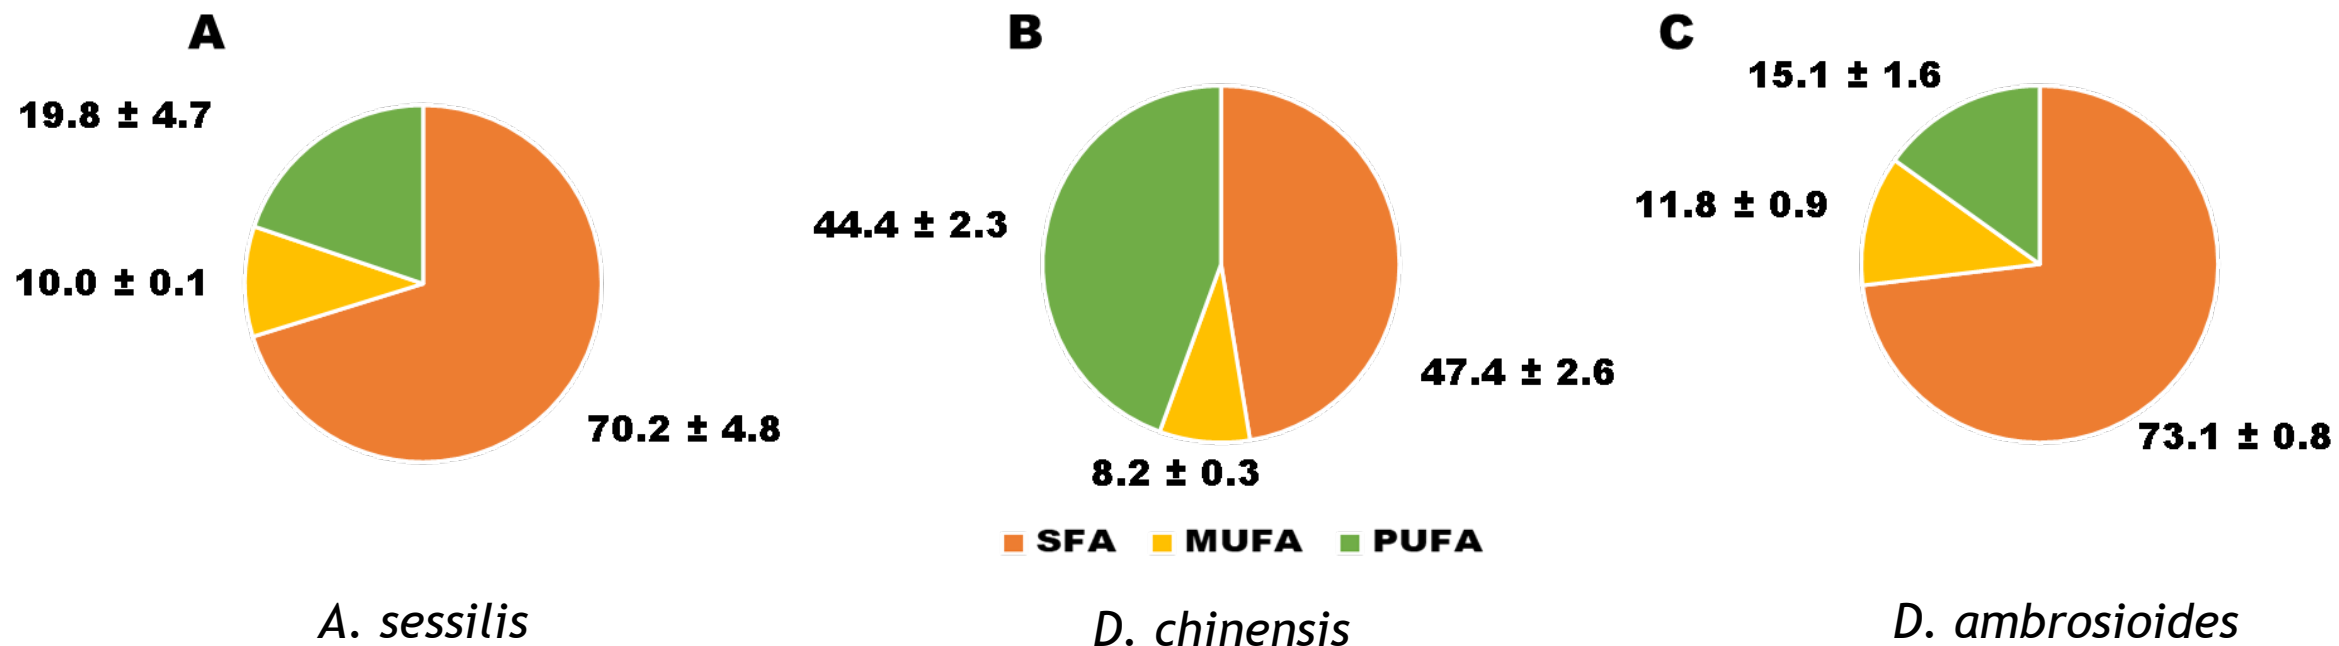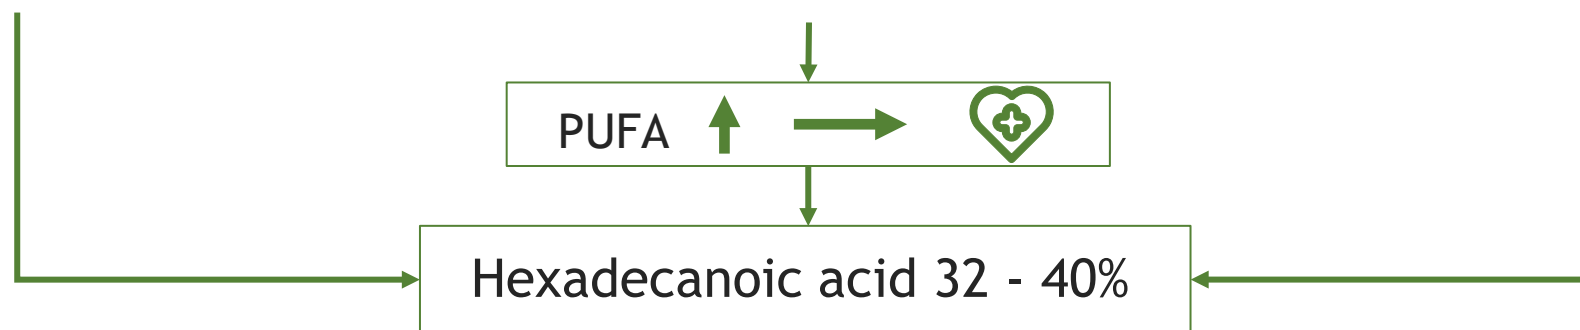

# Results

## Phenolic compounds

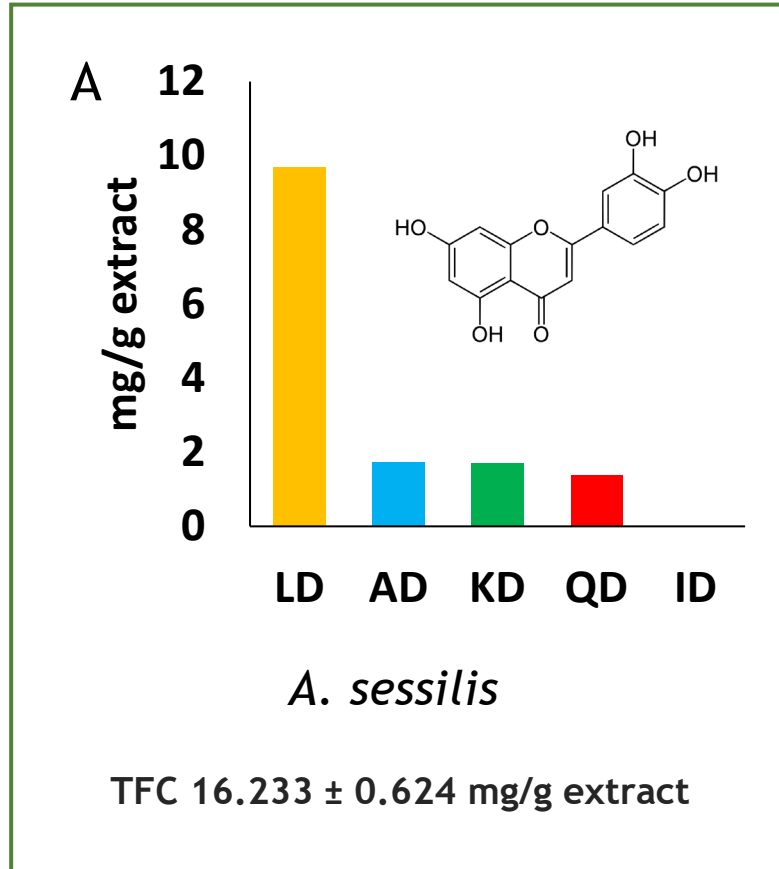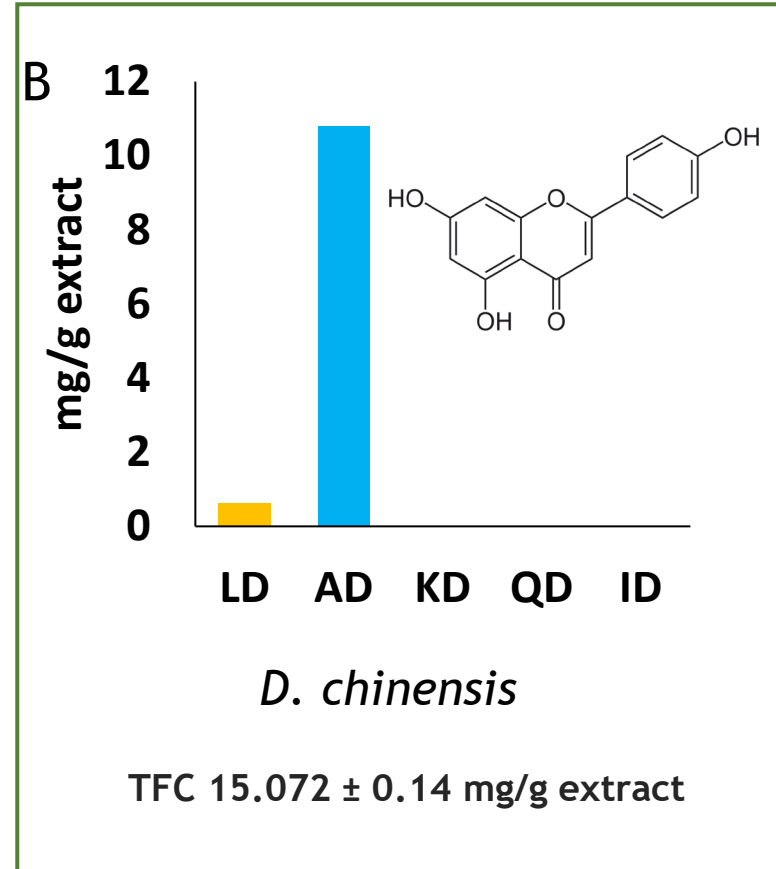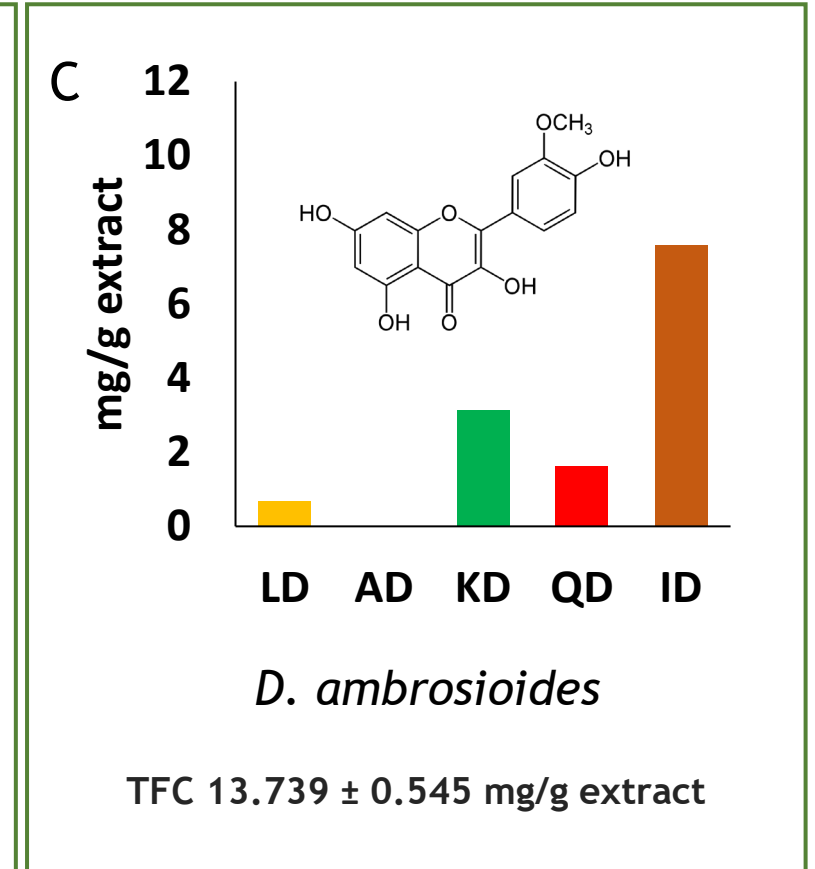

BIOACTIVITIES

# Conclusions

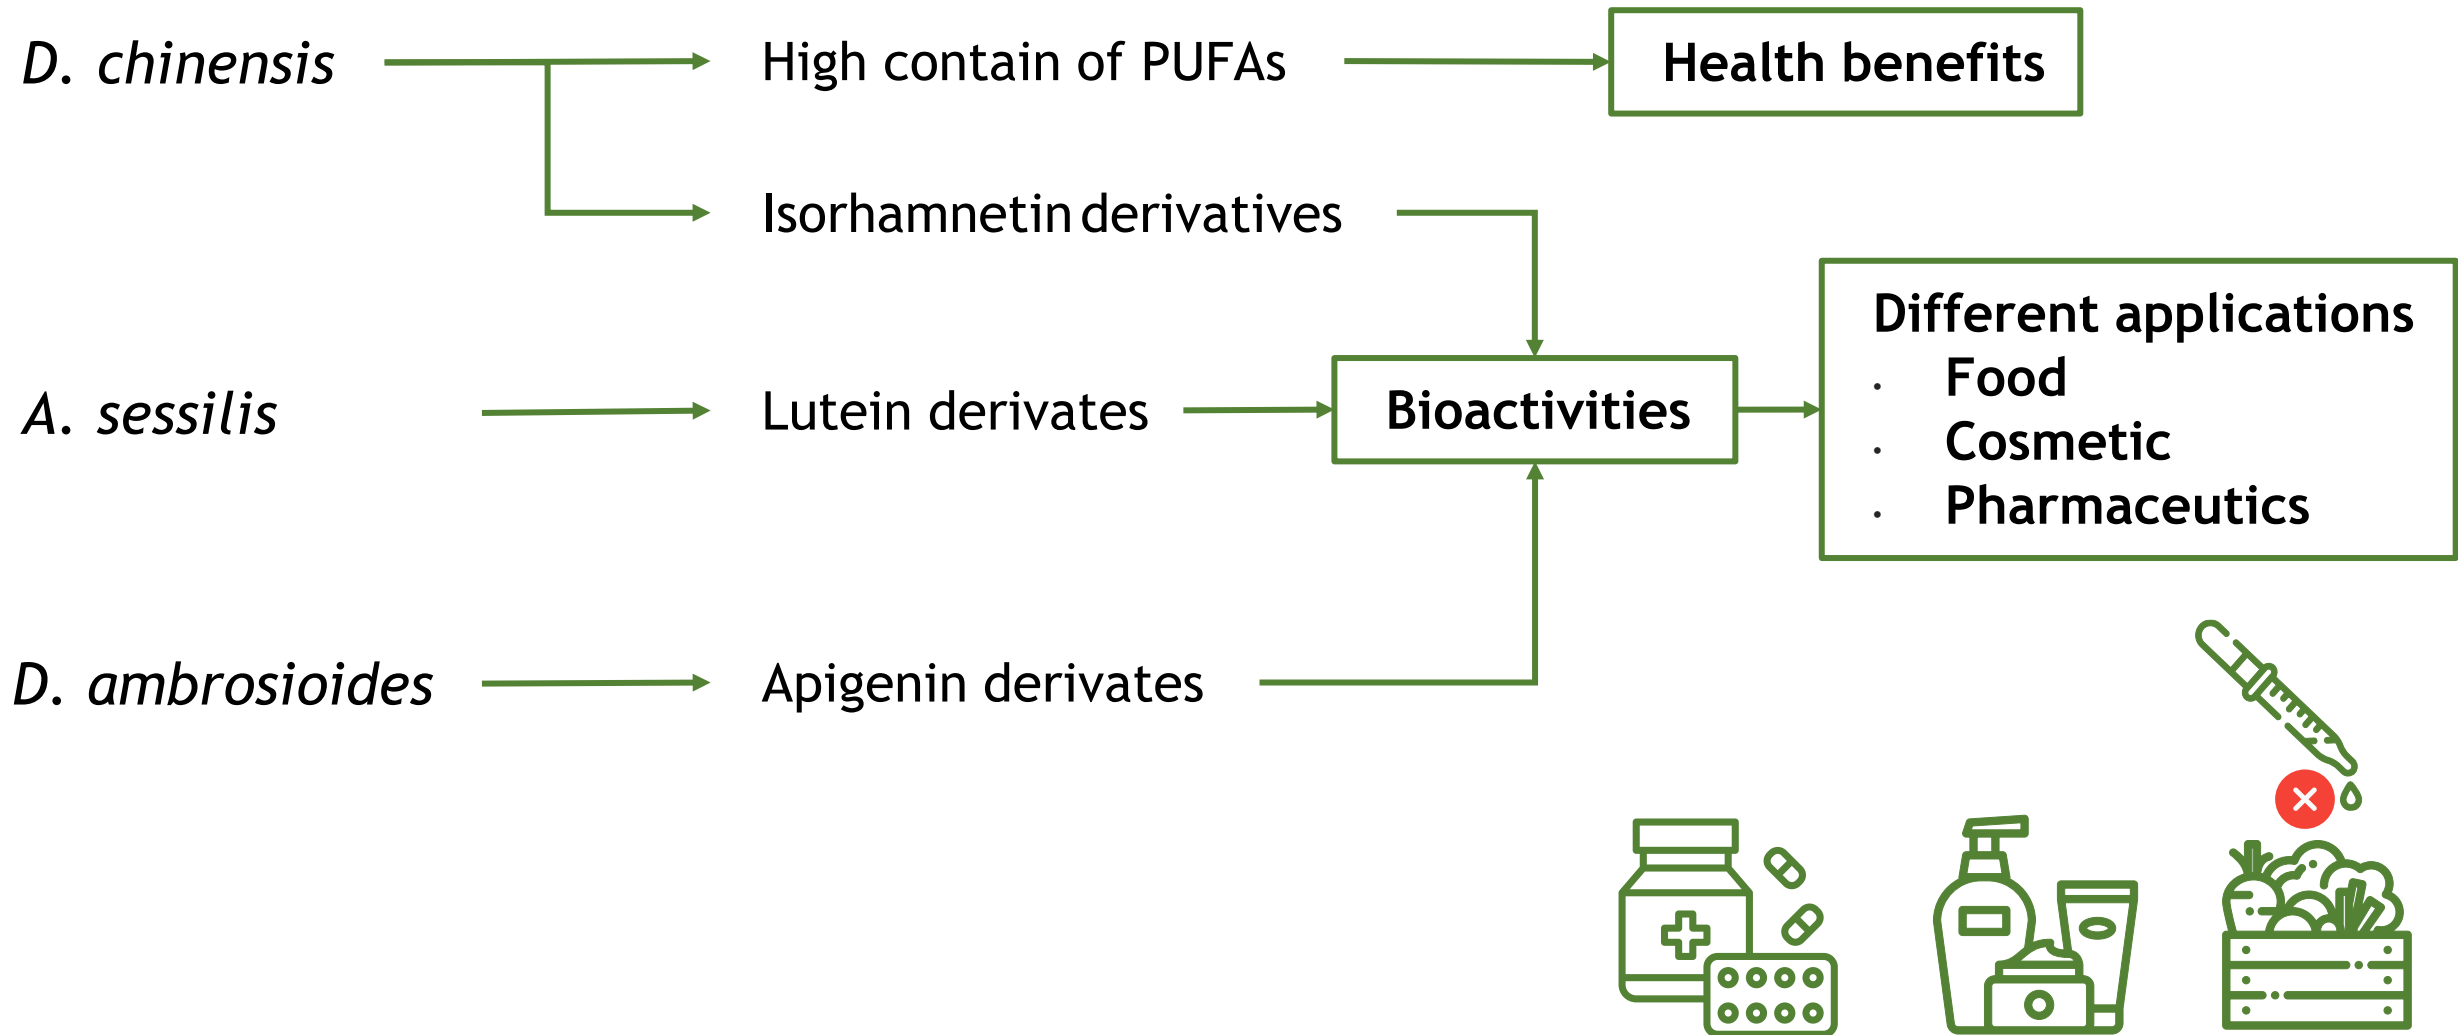

Supplement: s1 [file s1]
